# Supplementary material
Source: HighWire-hosted journal article supplement (https://www.highwirestage.com/highwire/filestream/110078/field_highwire_adjunct_files/0/0583.pdf)

**Supplemental Figure 1:** Inclusion and exclusion criteria for patients in pediatric MOGAD imaging cohort.

**Supplemental Figure 2:** Categories of imaging features that were scored and examples of lesions that fell within different stratification categories.

**Supplemental Figure 3:** Imaging phenotypes in each patient at presentation and relapse. Each line represents an individual patient. The majority of patients manifested change in phenotype at relapse.

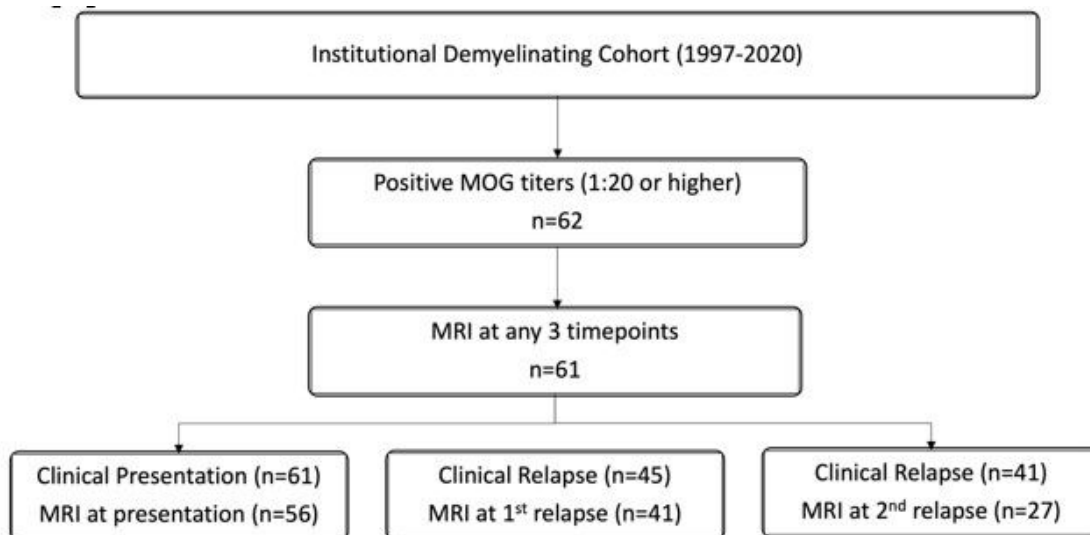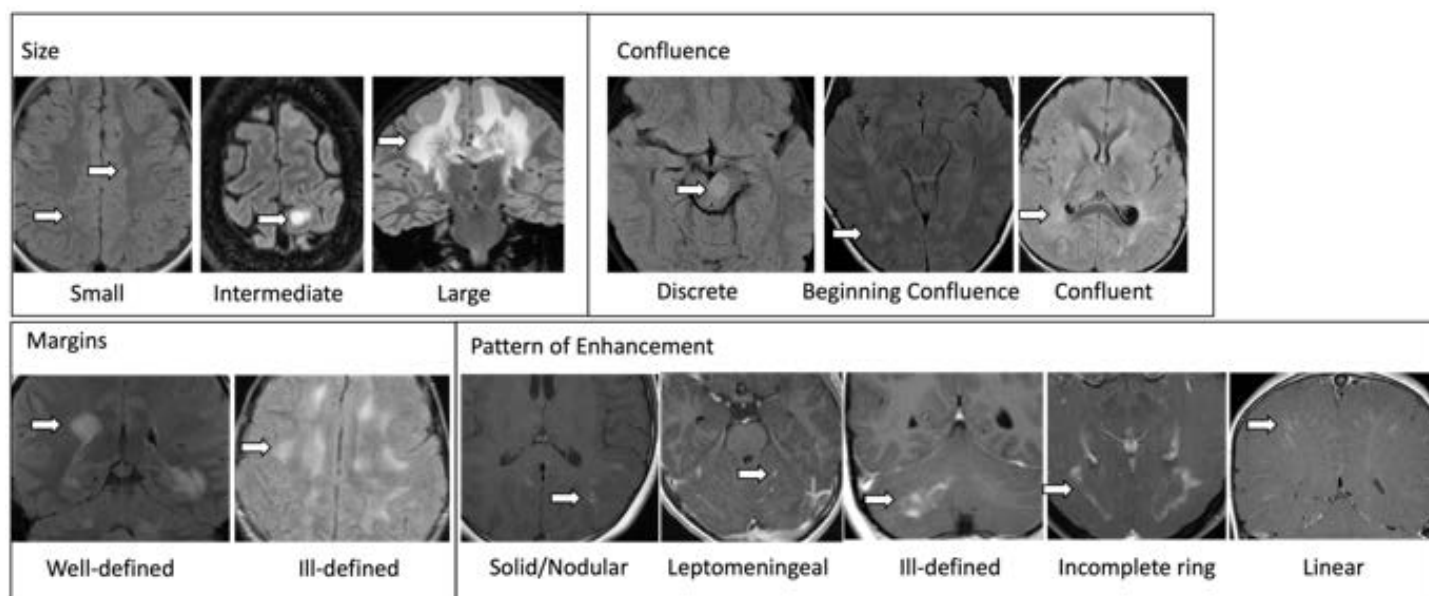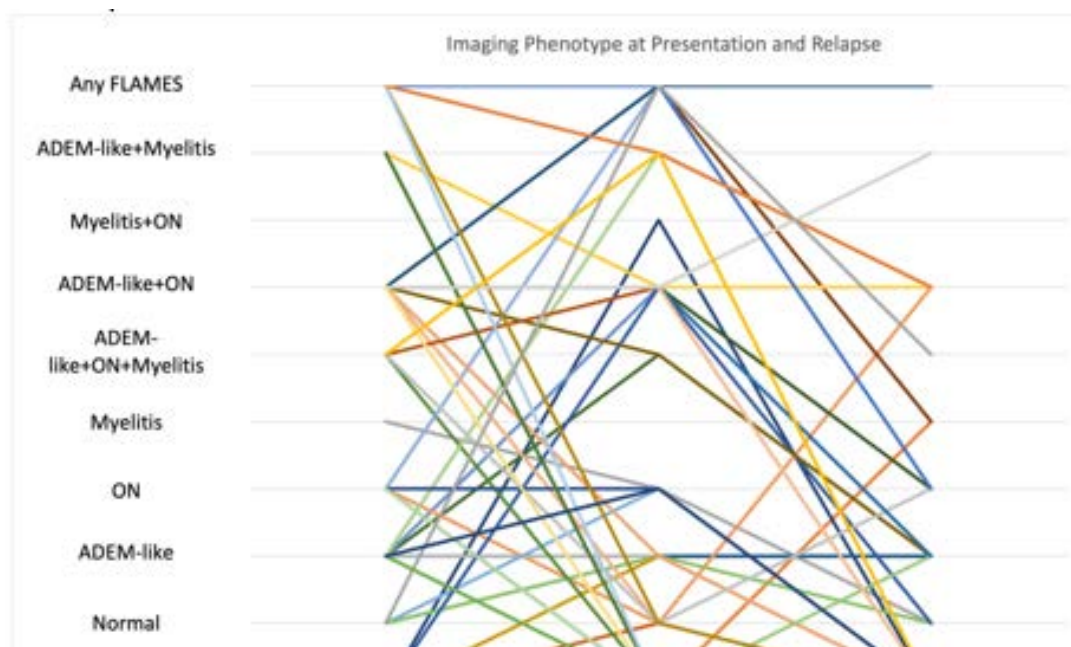

Supplement: 0583.pdf [file 0583.pdf]
